# Supplementary material for: Urban Stormwater Quality in Arequipa, Southern Peru: An Initial Assessment
Source: MDPI journal article supplement (doi:10.3390/w16010108), 2023-12-27

## Supplemental Information

**Table S1.** Antecedent dry days (ADD), total precipitation amount (PP), and storm duration (D) of each storm event considered in this study, with stormwater physicochemical characteristics. Letters indicate first flush (F) and peak flow (P). Colors indicate analyses below MPLs (black), above MPLs (red), and not regulated (blue) under Peruvian irrigation norm DS 004-2017-MINAM.

|   | Date      | ADD<br>(days) | PP<br>(mm) | D<br>(min.) | Flow rate<br>(L/s) | pH  | Conductivity<br>( $\mu\text{S}/\text{cm}$ ) | Salinity<br>(PSU) | Resistivity<br>( $\Omega\cdot\text{cm}$ ) | Density<br>( $\text{g}/\text{cm}^3$ ) | TDS<br>(ppt) | Turbidity<br>(NTU) | Temp.<br>( $^{\circ}\text{C}$ ) |
|---|-----------|---------------|------------|-------------|--------------------|-----|---------------------------------------------|-------------------|-------------------------------------------|---------------------------------------|--------------|--------------------|---------------------------------|
| F | 6-Jan-22  | 301           | 5.3        | 40          | 0.135              | 8.2 | 1245.8                                      | 0.6               | 945.7                                     | 0.999                                 | 0.81         | 345.9              | 19.9                            |
| P | 6-Jan-22  | 301           | 5.3        | 40          | 0.135              | 8.2 | 1136.0                                      | 0.6               | 1039.3                                    | 0.999                                 | 0.74         | 882.0              | 18.8                            |
| F | 12-Jan-22 | 5             | 1.9        | 50          | 0.055              | 8.5 | 1413.1                                      | 0.7               | 864.9                                     | 1.000                                 | 0.92         | 359.7              | 19.9                            |
| P | 12-Jan-22 | 5             | 1.9        | 50          | 0.055              | 8.3 | 1290.1                                      | 0.6               | 931.8                                     | 0.999                                 | 0.84         | 1617.0             | 17.1                            |
| P | 22-Jan-22 | 9             | 2.8        | 24          | 0.006              | 8.7 | 655.8                                       | 0.3               | 1646.8                                    | 0.998                                 | 0.43         | 828.3              | 22.7                            |
| F | 16-Feb-22 | 24            | 4.8        | 167         | 0.384              | 8.1 | 691.0                                       | 0.3               | 1501.8                                    | 0.998                                 | 0.45         | 847.5              | 23.7                            |
| P | 16-Feb-22 | 24            | 4.8        | 167         | 0.757              | 8.7 | 419.2                                       | 0.2               | 2746.1                                    | 0.999                                 | 0.27         | 1382.5             | 18.5                            |
| F | 24-Feb-22 | 7             | 3.8        | 88          | 0.020              | 8.5 | 1120.8                                      | 0.6               | 1077.6                                    | 0.999                                 | 0.73         | 1544.5             | 18.0                            |
| P | 24-Feb-22 | 7             | 3.8        | 88          | 0.047              | 8.4 | 659.6                                       | 0.3               | 1867.3                                    | 0.999                                 | 0.43         | 1684.5             | 15.5                            |
| F | 7-Dec-22  | 265           | 1.8        | 69          | 0.015              | 8.2 | 3515.1                                      | 1.9               | 343.9                                     | 1.000                                 | 2.28         | 721.0              | 26.9                            |
| P | 7-Dec-22  | 265           | 1.8        | 69          | 0.038              | 7.9 | 2240.5                                      | 1.2               | 3907.8                                    | 1.000                                 | 1.46         | 628.3              | 18.5                            |
| F | 30-Dec-22 | 22            | 2.7        | 21          | 1.975              | 8.1 | 1689.0                                      | 0.9               | 711.6                                     | 1.000                                 | 1.10         | 1176.5             | 18.4                            |
| P | 30-Dec-22 | 22            | 2.7        | 21          | 0.068              | 8.1 | 1213.2                                      | 0.6               | 999.0                                     | 0.999                                 | 0.79         | 1264.8             | 17.5                            |
| F | 19-Jan-23 | 19            | 2.8        | 199         | 0.151              | 7.4 | 917.9                                       | 0.5               | 1179.5                                    | 0.998                                 | 0.60         | 613.9              | 26.3                            |
| P | 19-Jan-23 | 19            | 2.8        | 199         | 0.047              | 7.9 | 943.3                                       | 0.5               | 1237.0                                    | 0.999                                 | 0.61         | 1203.1             | 20.3                            |
| F | 25-Jan-23 | 5             | 16.9       | 44          | 3.275              | 8.0 | 263.2                                       | 0.1               | 4242.6                                    | 0.998                                 | 0.17         | 362.8              | 20.4                            |
| P | 25-Jan-23 | 5             | 16.9       | 44          | 0.173              | 8.1 | 380.7                                       | 0.2               | 2951.3                                    | 0.999                                 | 0.25         | 890.0              | 19.2                            |
| F | 5-Mar-23  | 38            | 4.4        | 31          | 1.803              | 9.3 | 349.8                                       | 0.2               | 3115.5                                    | 0.998                                 | 0.23         | 727.7              | 22.6                            |
| P | 5-Mar-23  | 38            | 4.4        | 31          | 0.568              | 8.8 | 361.6                                       | 0.2               | 3060.7                                    | 0.998                                 | 0.24         | 443.3              | 21.8                            |
| F | 10-Mar-23 | 4             | 1.7        | 24          | 0.010              | 8.4 | 440.1                                       | 0.2               | 2733.6                                    | 0.999                                 | 0.29         | 1238.9             | 18.8                            |
| P | 10-Mar-23 | 4             | 1.7        | 24          | 0.008              | 8.3 | 523.7                                       | 0.3               | 2339.7                                    | 0.999                                 | 0.34         | 1270.6             | 18.2                            |
| P | 3-Apr-23  | 23            | 1.8        | 15          | 0.001              | 8.1 | 763.9                                       | 0.4               | 1509.9                                    | 0.999                                 | 0.50         | 798.9              | 21.1                            |

**Table S2.** Results from the laboratory analyses applied to stormwater samples. Letters indicate first flush (F) and peak flow (P). Colors indicate analyses below MPLs (black), above MPLs (red), and not regulated (blue) under Peruvian irrigation norm DS 004-2017-MINAM.

|   | Date      | Al    | As    | B     | Ba    | Ca      | Cd    | Co    | Cu    | Cr    | Fe    | K       | Li    | Mg     | Mn    |
|---|-----------|-------|-------|-------|-------|---------|-------|-------|-------|-------|-------|---------|-------|--------|-------|
| F | 6-Jan-22  | 0.057 | 0.033 | 2.108 | 0.101 | 157.550 | 0.000 | 0.009 | 0.347 | 0.007 | 0.327 | 60.297  | 0.144 | 20.656 | 0.165 |
| P | 6-Jan-22  | 0.294 | 0.023 | 1.294 | 0.091 | 103.440 | 0.001 | 0.007 | 0.248 | 0.006 | 0.499 | 53.957  | 0.083 | 15.202 | 0.140 |
| F | 12-Jan-22 | 0.104 | 0.029 | 1.800 | 0.125 | 148.890 | 0.001 | 0.006 | 0.205 | 0.006 | 0.204 | 54.153  | 0.135 | 23.266 | 0.090 |
| P | 12-Jan-22 | 0.261 | 0.017 | 1.687 | 0.080 | 106.840 | 0.000 | 0.007 | 0.258 | 0.005 | 0.352 | 51.598  | 0.225 | 23.650 | 0.128 |
| P | 22-Jan-22 | 0.122 | 0.010 | 0.627 | 0.047 | 54.960  | 0.000 | 0.004 | 0.126 | 0.006 | 0.231 | 40.739  | 0.041 | 8.279  | 0.054 |
| F | 16-Feb-22 | 0.091 | 0.009 | 1.007 | 0.055 | 63.580  | 0.000 | 0.005 | 0.135 | 0.007 | 0.188 | 43.529  | 0.044 | 9.232  | 0.060 |
| P | 16-Feb-22 | 0.060 | 0.007 | 0.580 | 0.033 | 32.470  | 0.000 | 0.003 | 0.054 | 0.001 | 0.105 | 20.252  | 0.027 | 4.555  | 0.031 |
| F | 2-Feb-22  | 0.039 | 0.016 | 1.425 | 0.063 | 84.390  | 0.000 | 0.006 | 0.162 | 0.004 | 0.142 | 46.368  | 0.096 | 14.877 | 0.078 |
| P | 2-Feb-22  | 0.034 | 0.006 | 0.685 | 0.037 | 48.950  | 0.000 | 0.003 | 0.086 | 0.003 | 0.085 | 28.739  | 0.053 | 8.495  | 0.050 |
| F | 7-Dec-22  | 1.037 | 0.059 | 3.879 | 0.142 | 397.580 | 0.003 | 0.028 | 0.146 | 0.033 | 8.443 | 180.203 | 0.264 | 61.951 | 0.853 |
| P | 7-Dec-22  | 0.484 | 0.042 | 2.959 | 0.128 | 247.970 | 0.002 | 0.020 | 0.059 | 0.018 | 8.559 | 93.045  | 0.188 | 39.043 | 0.816 |
| F | 30-Dec-22 | 0.212 | 0.022 | 1.210 | 0.183 | 125.870 | 0.001 | 0.010 | 0.262 | 0.010 | 0.631 | 54.075  | 0.089 | 16.084 | 0.293 |
| P | 30-Dec-22 | 0.187 | 0.020 | 1.349 | 0.204 | 153.940 | 0.000 | 0.012 | 0.207 | 0.011 | 0.683 | 64.601  | 0.100 | 19.657 | 0.306 |
| F | 19-Jan-23 | 0.081 | 0.011 | 0.785 | 0.072 | 73.650  | 0.000 | 0.005 | 0.148 | 0.010 | 0.248 | 38.126  | 0.041 | 8.345  | 0.071 |
| P | 19-Jan-23 | 0.003 | 0.012 | 0.970 | 0.057 | 74.060  | 0.000 | 0.006 | 0.146 | 0.005 | 0.106 | 35.777  | 0.061 | 10.230 | 0.085 |
| F | 25-Jan-23 | 0.023 | 0.004 | 0.164 | 0.044 | 27.780  | 0.000 | 0.001 | 0.012 | 0.001 | 0.114 | 8.944   | 0.007 | 2.041  | 0.048 |
| P | 25-Jan-23 | 0.038 | 0.003 | 0.324 | 0.052 | 36.700  | 0.001 | 0.002 | 0.033 | 0.003 | 0.097 | 15.230  | 0.014 | 3.553  | 0.053 |
| F | 5-Mar-23  | 0.058 | 0.001 | 0.197 | 0.022 | 29.670  | 0.000 | 0.002 | 0.050 | 0.005 | 0.060 | 18.122  | 0.010 | 2.571  | 0.015 |
| P | 5-Mar-23  | 0.016 | 0.005 | 0.153 | 0.025 | 28.150  | 0.000 | 0.002 | 0.021 | 0.003 | 0.056 | 13.586  | 0.009 | 2.698  | 0.026 |
| F | 3-Mar-23  | 0.003 | 0.013 | 0.322 | 0.027 | 36.590  | 0.000 | 0.003 | 0.065 | 0.003 | 0.029 | 17.325  | 0.024 | 4.054  | 0.034 |
| P | 3-Mar-23  | 0.012 | 0.007 | 0.384 | 0.046 | 53.200  | 0.000 | 0.003 | 0.091 | 0.004 | 0.048 | 18.796  | 0.033 | 5.082  | 0.082 |
| P | 3-Apr-23  | 0.031 | 0.008 | 0.589 | 0.067 | 69.560  | 0.001 | 0.003 | 0.118 | 0.003 | 0.064 | 29.755  | 0.047 | 7.615  | 0.113 |

**Table S3.** Results from the laboratory analyses applied to stormwater samples. Letters indicate first flush (F) and peak flow (P). Colors indicate analyses below MPLs (black), above MPLs (red), and not regulated (blue) under Peruvian irrigation norm DS 004-2017-MINAM.

|   | Date      | Mo    | Na      | Ni    | P     | Pb    | S       | Se    | Si     | Sr    | Ti    | Tl    | V     | Zn    |
|---|-----------|-------|---------|-------|-------|-------|---------|-------|--------|-------|-------|-------|-------|-------|
| F | 6-Jan-22  | 0.030 | 128.507 | 0.021 | 2.223 | 0.002 | 138.929 | 0.017 | 9.572  | 0.494 | 0.009 | 0.013 | 0.027 | 0.307 |
| P | 6-Jan-22  | 0.022 | 99.024  | 0.017 | 2.692 | 0.008 | 75.960  | 0.008 | 8.064  | 0.337 | 0.015 | 0.007 | 0.020 | 0.327 |
| F | 12-Jan-22 | 0.028 | 133.390 | 0.017 | 1.364 | 0.005 | 96.451  | 0.010 | 13.931 | 0.520 | 0.004 | 0.004 | 0.012 | 0.237 |
| P | 12-Jan-22 | 0.023 | 112.336 | 0.014 | 1.627 | 0.011 | 74.585  | 0.011 | 7.925  | 0.356 | 0.010 | 0.005 | 0.012 | 0.187 |
| P | 22-Jan-22 | 0.010 | 56.625  | 0.011 | 2.604 | 0.005 | 37.792  | 0.011 | 5.796  | 0.174 | 0.007 | 0.003 | 0.014 | 0.202 |
| F | 16-Feb-22 | 0.013 | 76.492  | 0.013 | 2.786 | 0.007 | 46.790  | 0.005 | 5.561  | 0.252 | 0.005 | 0.004 | 0.013 | 0.219 |
| P | 16-Feb-22 | 0.008 | 36.299  | 0.006 | 0.986 | 0.011 | 23.359  | 0.002 | 3.296  | 0.109 | 0.003 | 0.003 | 0.007 | 0.065 |
| F | 2-Feb-22  | 0.020 | 109.478 | 0.014 | 1.707 | 0.004 | 73.079  | 0.009 | 7.163  | 0.341 | 0.003 | 0.007 | 0.010 | 0.216 |
| P | 2-Feb-22  | 0.011 | 61.907  | 0.008 | 1.195 | 0.005 | 40.660  | 0.001 | 4.813  | 0.246 | 0.002 | 0.007 | 0.006 | 0.114 |
| F | 7-Dec-22  | 0.072 | 471.277 | 0.065 | 5.030 | 0.010 | 327.191 | 0.002 | 22.189 | 1.599 | 0.028 | 0.019 | 0.034 | 3.299 |
| P | 7-Dec-22  | 0.039 | 229.344 | 0.036 | 2.331 | 0.000 | 188.769 | 0.008 | 18.651 | 0.828 | 0.016 | 0.006 | 0.020 | 1.934 |
| F | 30-Dec-22 | 0.024 | 125.227 | 0.025 | 2.302 | 0.001 | 98.083  | 0.017 | 10.440 | 0.384 | 0.007 | 0.012 | 0.010 | 0.773 |
| P | 30-Dec-22 | 0.027 | 149.511 | 0.024 | 2.766 | 0.001 | 120.788 | 0.017 | 11.439 | 0.472 | 0.007 | 0.007 | 0.011 | 0.799 |
| F | 19-Jan-23 | 0.015 | 82.589  | 0.012 | 2.558 | 0.003 | 56.046  | 0.008 | 6.349  | 0.245 | 0.004 | 0.003 | 0.014 | 0.270 |
| P | 19-Jan-23 | 0.018 | 90.949  | 0.012 | 1.284 | 0.000 | 55.499  | 0.010 | 6.414  | 0.251 | 0.001 | 0.007 | 0.007 | 0.174 |
| F | 25-Jan-23 | 0.004 | 15.443  | 0.005 | 0.720 | 0.004 | 17.967  | 0.003 | 1.650  | 0.081 | 0.000 | 0.003 | 0.002 | 0.087 |
| P | 25-Jan-23 | 0.009 | 30.980  | 0.007 | 1.003 | 0.003 | 24.503  | 0.001 | 4.113  | 0.113 | 0.001 | 0.000 | 0.005 | 0.111 |
| F | 5-Mar-23  | 0.007 | 27.684  | 0.006 | 0.976 | 0.001 | 21.588  | 0.006 | 3.681  | 0.074 | 0.001 | 0.004 | 0.007 | 0.059 |
| P | 5-Mar-23  | 0.004 | 25.255  | 0.004 | 1.448 | 0.002 | 18.331  | 0.005 | 3.345  | 0.078 | 0.000 | 0.000 | 0.002 | 0.038 |
| F | 3-Mar-23  | 0.009 | 39.300  | 0.006 | 1.027 | 0.001 | 26.902  | 0.004 | 3.414  | 0.104 | 0.000 | 0.002 | 0.003 | 0.049 |
| P | 3-Mar-23  | 0.011 | 44.220  | 0.006 | 1.069 | 0.001 | 32.266  | 0.011 | 2.722  | 0.141 | 0.000 | 0.004 | 0.004 | 0.227 |
| P | 3-Apr-23  | 0.016 | 64.470  | 0.011 | 0.987 | 0.004 | 45.765  | 0.010 | 8.329  | 0.207 | 0.001 | 0.007 | 0.006 | 0.278 |

**Figure S1.** Correlation matrix for all analytes considered in this study, including only samples collected during first flush. Color scale indicates how strong correlations are between two given variables, being this negative (red), positive (blue), and no correlation (white).

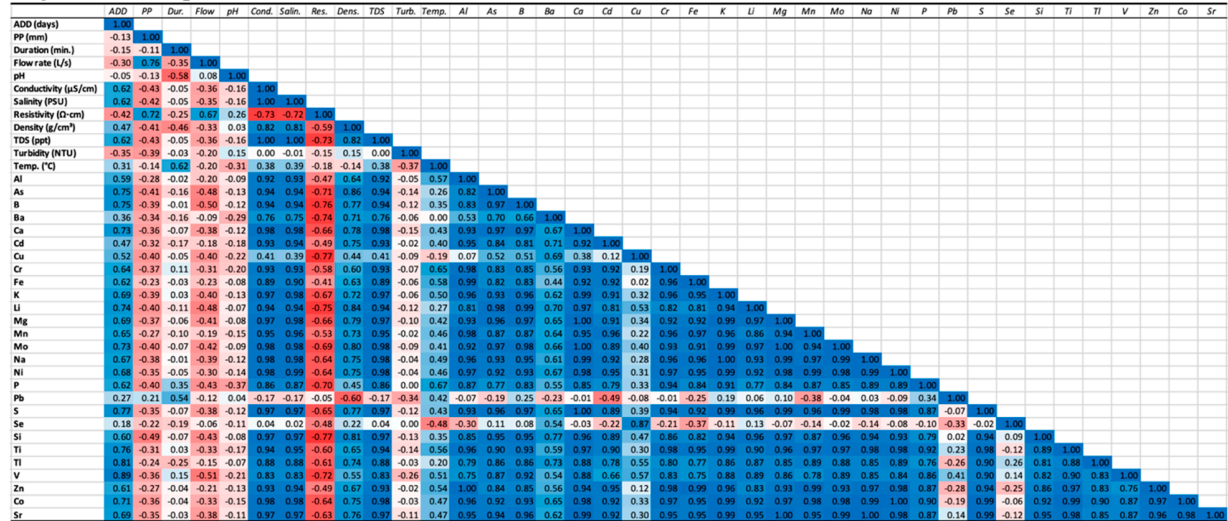

**Figure S2.** Correlation matrix for all analytes considered in this study, including only samples collected during peak flow. Color scale indicates how strong correlations are between two given variables, being this negative (red), positive (blue), and no correlation (white).

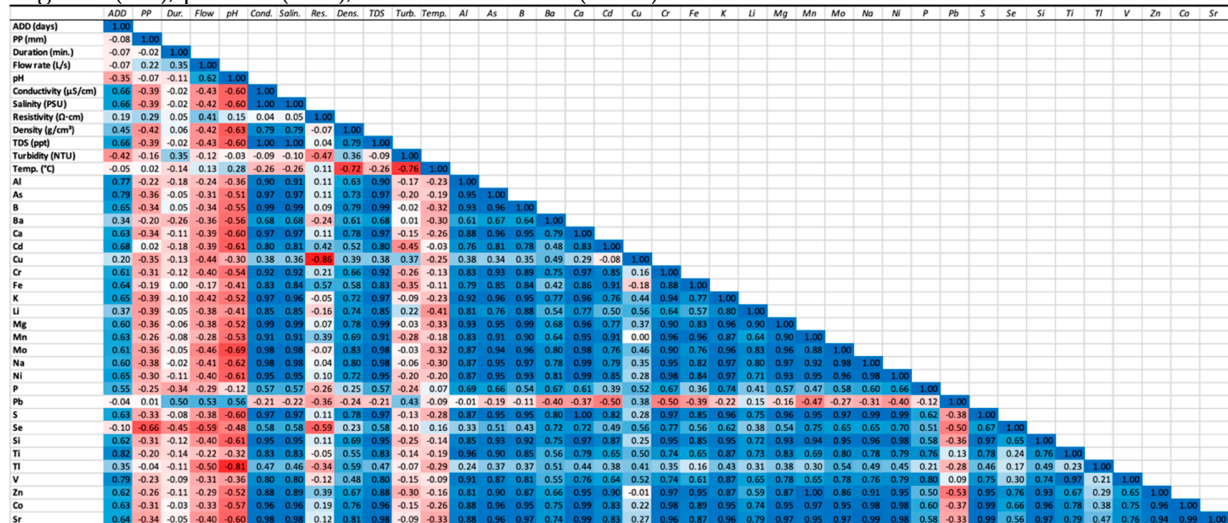

Supplement: s1 [file s1]
